# Supplementary figures and images for: Origins of curvature in meso-tetra(4-sulfonatophenyl) porphine aggregation: molecular dynamics and electronic spectroscopy
Source: Royal Society of Chemistry journal article supplement (doi:10.1039/d5me00010f), 2025-01-01

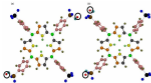

Supplement: d5me00010f2.pdf [file d5me00010f2.pdf]
